# Supplementary material
Source: HighWire-hosted journal article supplement (http://www.cmaj.ca/highwire/filestream/59202/field_highwire_adjunct_files/8/strep-cohen-6-at.pdf)
Supplement: strep-cohen-6-at.pdf [file strep-cohen-6-at.pdf]

## Appendix 6 (as supplied by the authors): Variables used in the prediction rules

*NB: When assessing the number of predictors in the CPR we divided some original predictors into multiple sub-variables. For example, assessing the “no upper respiratory symptoms” variable from the Wald score needs the assessment of three sub-variables (i.e., rhinorrhea, cough or conjunctivitis), as mentioned by the authors. All original clinical variables are reported in Table 2.*

| Variables                                                   | Forsyth | Breese | Fujikawa | Edmond | McIsaac | Wald | Attia | Joachim |
|-------------------------------------------------------------|---------|--------|----------|--------|---------|------|-------|---------|
| <b>1. Clinical variables suggestive of GAS</b>              |         |        |          |        |         |      |       |         |
| Sudden onset                                                |         |        |          |        |         |      |       | ✓       |
| Age                                                         |         | ✓      |          | ✓      | ✓       | ✓    |       | ✓       |
| Sore throat/pain in throat                                  |         | ✓      | ✓        |        |         |      |       |         |
| Fever                                                       | ✓       | ✓      | ✓        |        | ✓       | ✓    |       |         |
| Headache                                                    |         | ✓      |          |        |         |      |       | ✓       |
| Nausea/vomiting                                             |         |        | ✓        |        |         |      |       |         |
| Abdominal pain                                              |         |        |          |        |         |      |       | ✓       |
| Abnormal pharynx                                            |         |        |          |        |         |      |       |         |
| Erythema/redness                                            |         | ✓      | ✓        | ✓      |         | ✓    |       |         |
| Petechiae (pharynx/palate)/doughnut lesions                 |         | ✓      | ✓        |        |         |      |       | ✓       |
| Ulcerations                                                 |         | ✓      |          |        |         |      |       |         |
| Tonsillar swelling                                          |         | ✓      |          | ✓      | ✓       | ✓    | ✓     |         |
| Exudate (pharynx/tonsils)                                   | ✓       | ✓      | ✓        |        | ✓       | ✓    |       |         |
| Cervical lymph nodes                                        |         |        |          |        |         |      |       |         |
| Swelling/enlargement                                        |         | ✓      | ✓        |        |         | ✓    | ✓     |         |
| Tenderness                                                  | ✓       | ✓      |          | ✓      | ✓       | ✓    | ✓     | ✓       |
| No. of nodes                                                | ✓       |        |          |        |         |      |       |         |
| Season/month in which the patient is seen                   |         | ✓      |          |        |         | ✓    |       |         |
| Scarlatiniform rash                                         |         |        | ✓        | ✓      |         |      | ✓     |         |
| Strawberry tongue                                           |         |        | ✓        |        |         |      |       |         |
| Anorexia                                                    |         |        | ✓        |        |         |      |       |         |
| <b>2. Clinical variables suggestive of a viral etiology</b> |         |        |          |        |         |      |       |         |
| Conjunctivitis                                              |         |        |          |        |         | ✓    |       | ✓       |
| Rhinitis/coryza/rhinorrhea                                  |         |        | ✓        |        |         | ✓    | ✓     | ✓       |
| Cough                                                       |         | ✓      | ✓        |        | ✓       | ✓    |       |         |
| Diarrhea                                                    |         |        |          |        |         |      |       | ✓       |
| Viral rash                                                  |         |        | ✓        |        |         |      |       |         |
| Myalgia                                                     | ✓       |        |          |        |         |      |       |         |
| <b>3. Variables from blood</b>                              |         |        |          |        |         |      |       |         |
| White blood cell count                                      |         | ✓      |          |        |         |      |       |         |
| <b>Total no. of predictors</b>                              | 5       | 14     | 13       | 5      | 6       | 11   | 5     | 9       |
